# Supplementary material for: Nontoxic and Naturally Occurring Active Compounds as Potential Inhibitors of Biological Targets in Liriomyza trifolii
Source: MDPI journal article supplement (doi:10.3390/ijms232112791), 2022-10-24
Supplement: s1 [file s1]

PROCHECK

# (a) Ramachandran Plot

saves

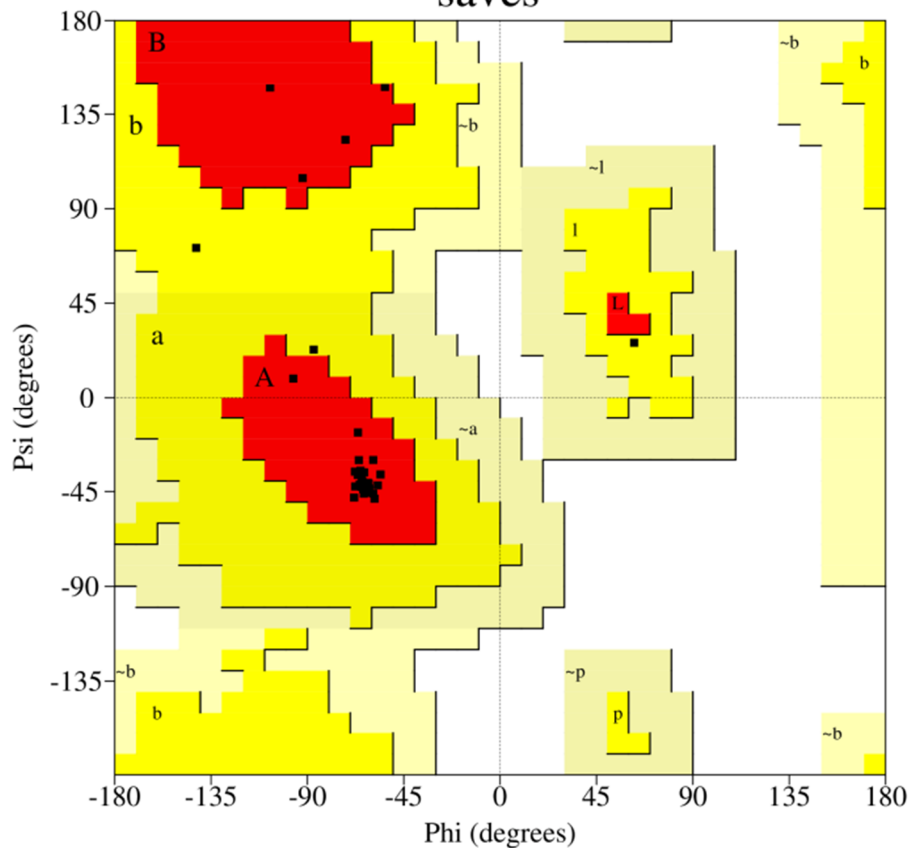

## Plot statistics

|                                                      |    |        |
|------------------------------------------------------|----|--------|
| Residues in most favoured regions [A,B,L]            | 36 | 92.3%  |
| Residues in additional allowed regions [a,b,l,p]     | 3  | 7.7%   |
| Residues in generously allowed regions [-a,-b,-l,-p] | 0  | 0.0%   |
| Residues in disallowed regions                       | 0  | 0.0%   |
| -----                                                |    |        |
| Number of non-glycine and non-proline residues       | 39 | 100.0% |
| Number of end-residues (excl. Gly and Pro)           | 2  |        |
| Number of glycine residues (shown as triangles)      | 1  |        |
| Number of proline residues                           | 1  |        |
| -----                                                |    |        |
| Total number of residues                             | 43 |        |

Based on an analysis of 118 structures of resolution of at least 2.0 Angstroms and R-factor no greater than 20%, a good quality model would be expected to have over 90% in the most favoured regions.

saves\_01.ps

PROCHECK

(b)

# Ramachandran Plot

saves

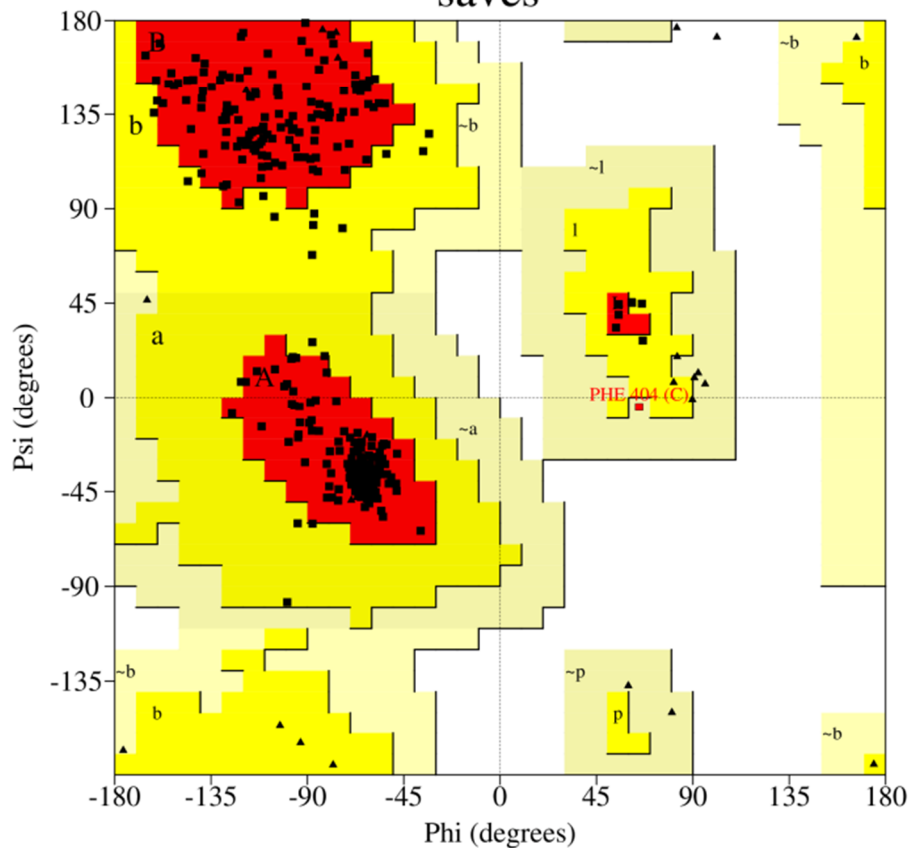

## Plot statistics

|                                                      |     |        |
|------------------------------------------------------|-----|--------|
| Residues in most favoured regions [A,B,L]            | 362 | 94.3%  |
| Residues in additional allowed regions [a,b,l,p]     | 21  | 5.5%   |
| Residues in generously allowed regions [-a,-b,-l,-p] | 1   | 0.3%   |
| Residues in disallowed regions                       | 0   | 0.0%   |
| -----                                                |     |        |
| Number of non-glycine and non-proline residues       | 384 | 100.0% |
| Number of end-residues (excl. Gly and Pro)           | 1   |        |
| Number of glycine residues (shown as triangles)      | 35  |        |
| Number of proline residues                           | 20  |        |
| -----                                                |     |        |
| Total number of residues                             | 440 |        |

Based on an analysis of 118 structures of resolution of at least 2.0 Angstroms and R-factor no greater than 20%, a good quality model would be expected to have over 90% in the most favoured regions.

saves\_01.ps

PROCHECK

# (c) Ramachandran Plot saves

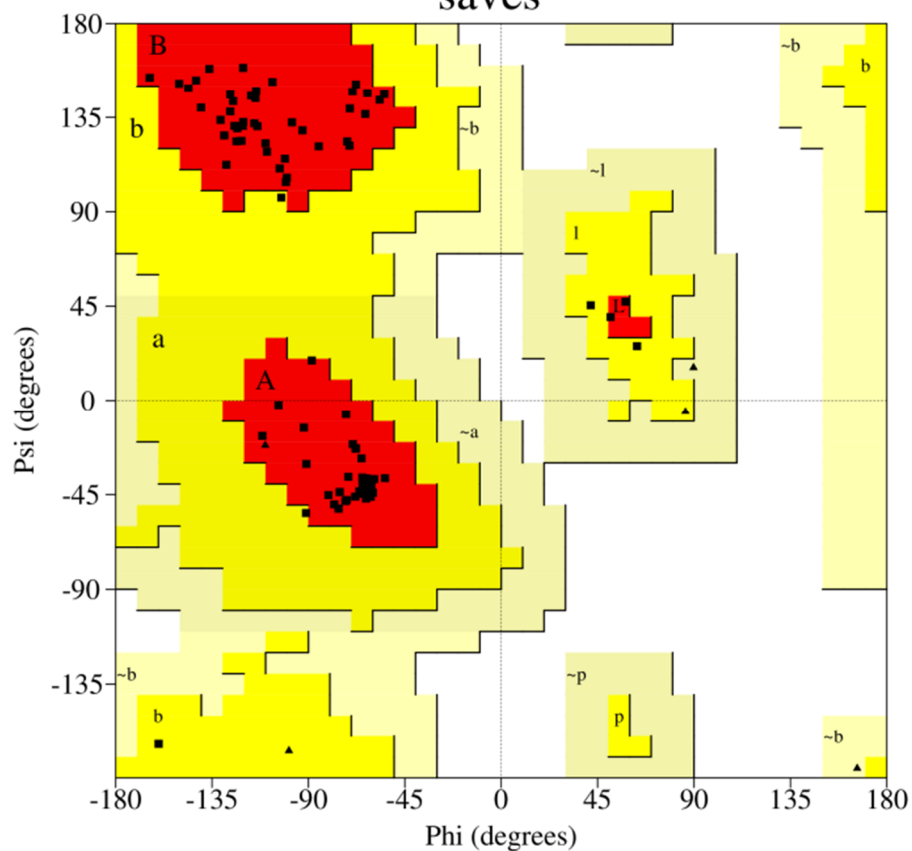

## Plot statistics

|                                                      |     |        |
|------------------------------------------------------|-----|--------|
| Residues in most favoured regions [A,B,L]            | 87  | 94.6%  |
| Residues in additional allowed regions [a,b,l,p]     | 5   | 5.4%   |
| Residues in generously allowed regions [-a,-b,-l,-p] | 0   | 0.0%   |
| Residues in disallowed regions                       | 0   | 0.0%   |
| -----                                                |     |        |
| Number of non-glycine and non-proline residues       | 92  | 100.0% |
| Number of end-residues (excl. Gly and Pro)           | 2   |        |
| Number of glycine residues (shown as triangles)      | 6   |        |
| Number of proline residues                           | 7   |        |
| -----                                                |     |        |
| Total number of residues                             | 107 |        |

Based on an analysis of 118 structures of resolution of at least 2.0 Angstroms and R-factor no greater than 20%, a good quality model would be expected to have over 90% in the most favoured regions.

PROCHECK

(d)

# Ramachandran Plot

saves

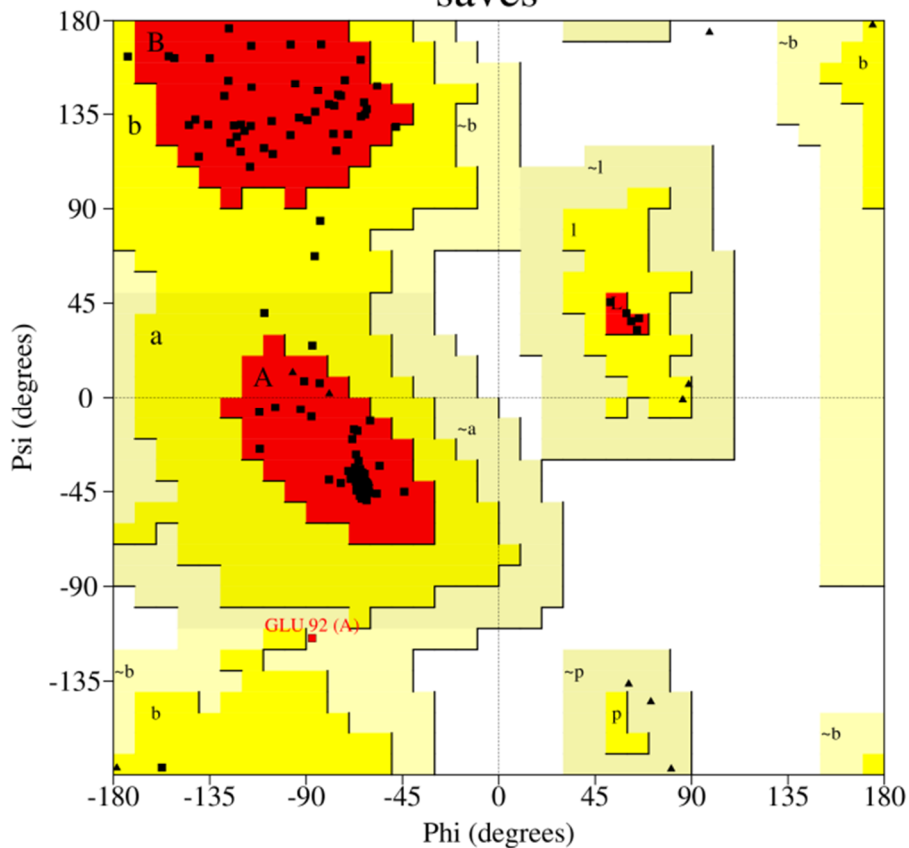

## Plot statistics

|                                                      |     |        |
|------------------------------------------------------|-----|--------|
| Residues in most favoured regions [A,B,L]            | 114 | 94.2%  |
| Residues in additional allowed regions [a,b,l,p]     | 6   | 5.0%   |
| Residues in generously allowed regions [-a,-b,-l,-p] | 1   | 0.8%   |
| Residues in disallowed regions                       | 0   | 0.0%   |
| -----                                                |     |        |
| Number of non-glycine and non-proline residues       | 121 | 100.0% |
| Number of end-residues (excl. Gly and Pro)           | 2   |        |
| Number of glycine residues (shown as triangles)      | 11  |        |
| Number of proline residues                           | 5   |        |
| -----                                                |     |        |
| Total number of residues                             | 139 |        |

Based on an analysis of 118 structures of resolution of at least 2.0 Angstroms and R-factor no greater than 20%, a good quality model would be expected to have over 90% in the most favoured regions.

saves\_01.ps

PROCHECK

(e)

# Ramachandran Plot

saves

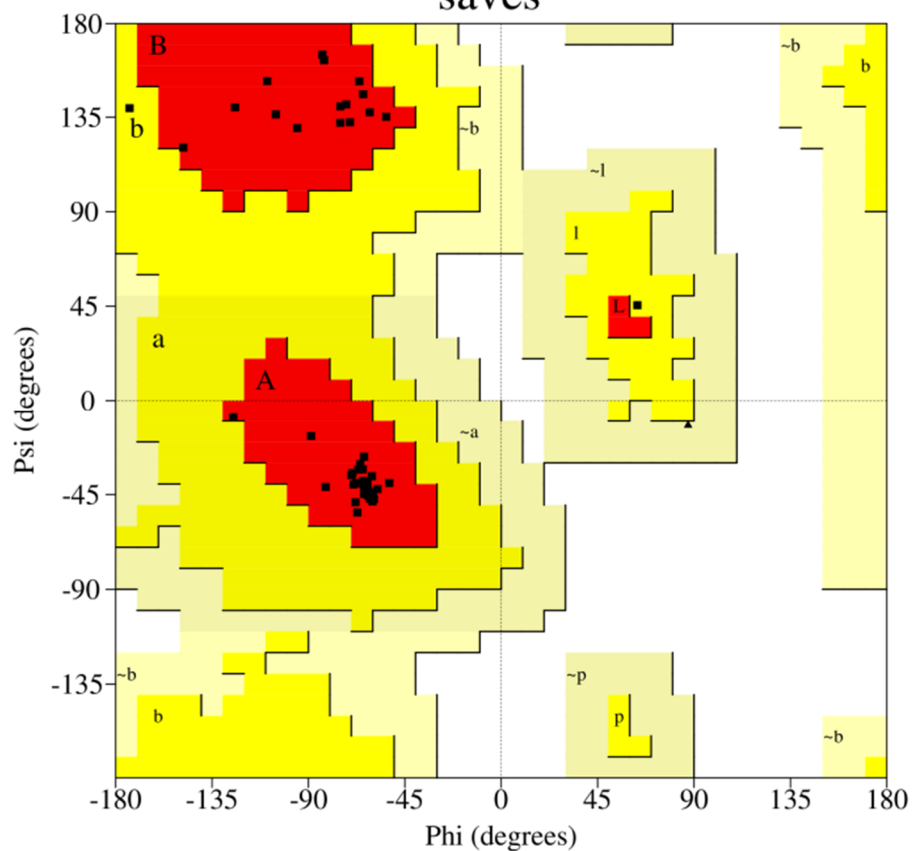

## Plot statistics

|                                                      |    |        |
|------------------------------------------------------|----|--------|
| Residues in most favoured regions [A,B,L]            | 54 | 96.4%  |
| Residues in additional allowed regions [a,b,l,p]     | 2  | 3.6%   |
| Residues in generously allowed regions [~a,~b,~l,~p] | 0  | 0.0%   |
| Residues in disallowed regions                       | 0  | 0.0%   |
| -----                                                |    |        |
| Number of non-glycine and non-proline residues       | 56 | 100.0% |
| Number of end-residues (excl. Gly and Pro)           | 1  |        |
| Number of glycine residues (shown as triangles)      | 1  |        |
| Number of proline residues                           | 3  |        |
| -----                                                |    |        |
| Total number of residues                             | 61 |        |

Based on an analysis of 118 structures of resolution of at least 2.0 Angstroms and R-factor no greater than 20%, a good quality model would be expected to have over 90% in the most favoured regions.

saves\_01.ps

PROCHECK

(f)

# Ramachandran Plot

saves

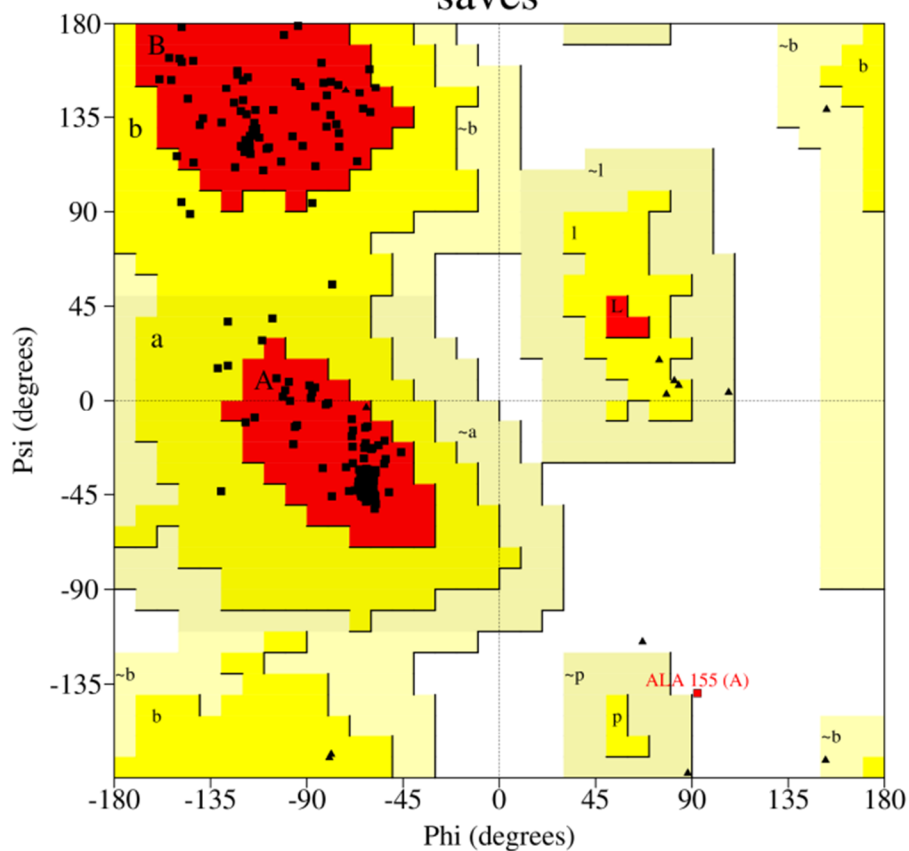

## Plot statistics

|                                                      |     |        |
|------------------------------------------------------|-----|--------|
| Residues in most favoured regions [A,B,L]            | 172 | 93.5%  |
| Residues in additional allowed regions [a,b,l,p]     | 11  | 6.0%   |
| Residues in generously allowed regions [-a,-b,-l,-p] | 0   | 0.0%   |
| Residues in disallowed regions                       | 1   | 0.5%   |
| -----                                                |     |        |
| Number of non-glycine and non-proline residues       | 184 | 100.0% |
| Number of end-residues (excl. Gly and Pro)           | 2   |        |
| Number of glycine residues (shown as triangles)      | 17  |        |
| Number of proline residues                           | 4   |        |
| -----                                                |     |        |
| Total number of residues                             | 207 |        |

Based on an analysis of 118 structures of resolution of at least 2.0 Angstroms and R-factor no greater than 20%, a good quality model would be expected to have over 90% in the most favoured regions.

PROCHECK

# (g) Ramachandran Plot

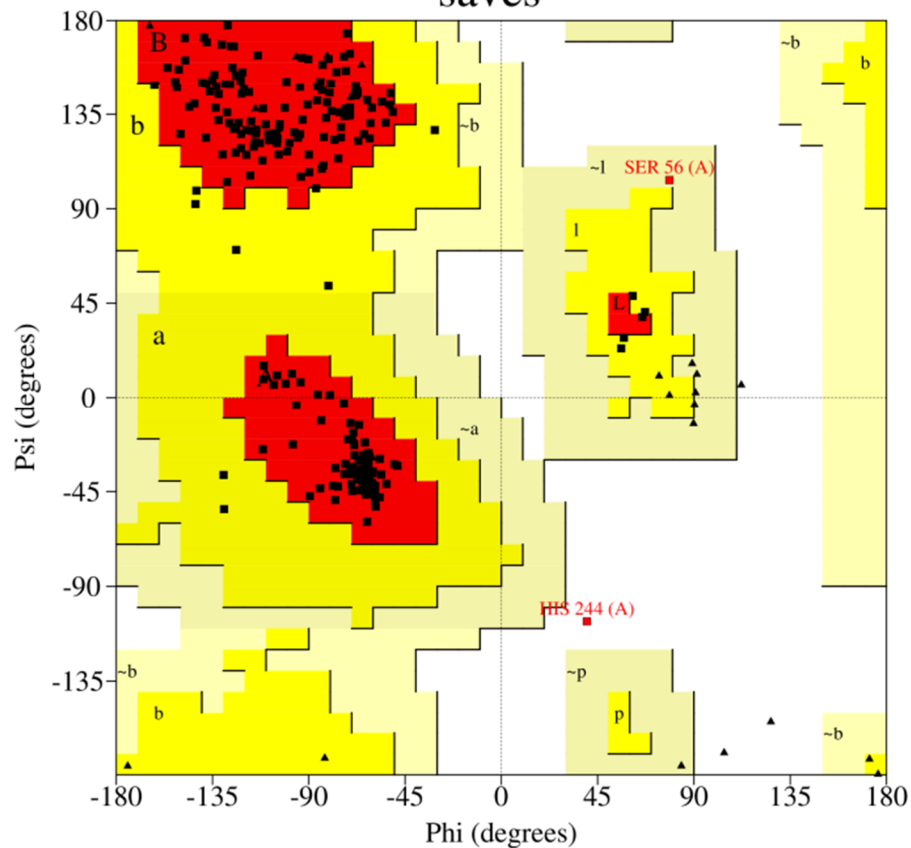

## Plot statistics

|                                                      |     |        |
|------------------------------------------------------|-----|--------|
| Residues in most favoured regions [A,B,L]            | 219 | 94.0%  |
| Residues in additional allowed regions [a,b,l,p]     | 12  | 5.2%   |
| Residues in generously allowed regions [-a,-b,-l,-p] | 1   | 0.4%   |
| Residues in disallowed regions                       | 1   | 0.4%   |
| -----                                                |     |        |
| Number of non-glycine and non-proline residues       | 233 | 100.0% |
| Number of end-residues (excl. Gly and Pro)           | 2   |        |
| Number of glycine residues (shown as triangles)      | 25  |        |
| Number of proline residues                           | 16  |        |
| -----                                                |     |        |
| Total number of residues                             | 276 |        |

Based on an analysis of 118 structures of resolution of at least 2.0 Angstroms and R-factor no greater than 20%, a good quality model would be expected to have over 90% in the most favoured regions.

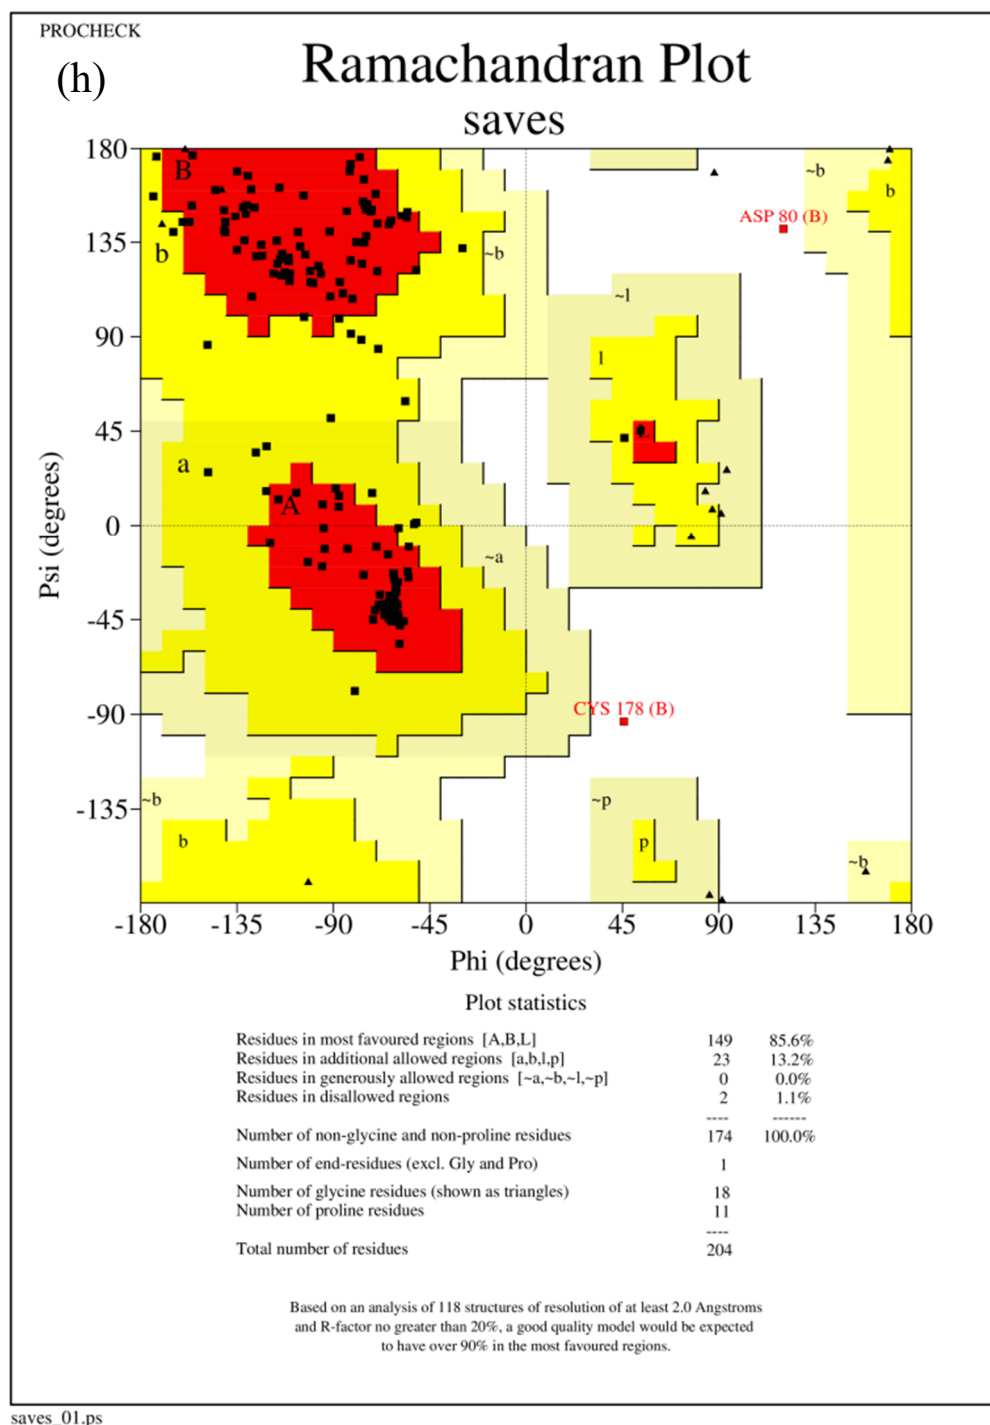

**Figure S1.** Ramachandran plot analysis of **a**: Acetylcholinesterase, **b**:  $\alpha$ -tubulin, **c**: Actin, **d**: Argenin kinase, **e**: Histone subunit 3, **f**: Hsp90, **g**: Elongation factor and **h**: Carbamoyl phosphate synthase. Here, the red color indicates a region that is favored energetically and structurally, yellow region for allowed, light yellow shows generously allowed region, and white for disallowed region. Phi ( $\Phi$ ) and Psi ( $\Psi$ ) angles determine torsion angles. Based on an analysis of the structures of resolution of at least 2.0 Å and R-factor no greater than 20%, a good quality model would be expected to have over 90% in the most favoured regions.
